# Supplementary material for: Vaccine Effects on Heterogeneity in Susceptibility and Implications for Population Health Management
Source: PubMed Central journal article supplement (PMC5698548; doi:10.1128/mbio.00796-17), 2017-11-21

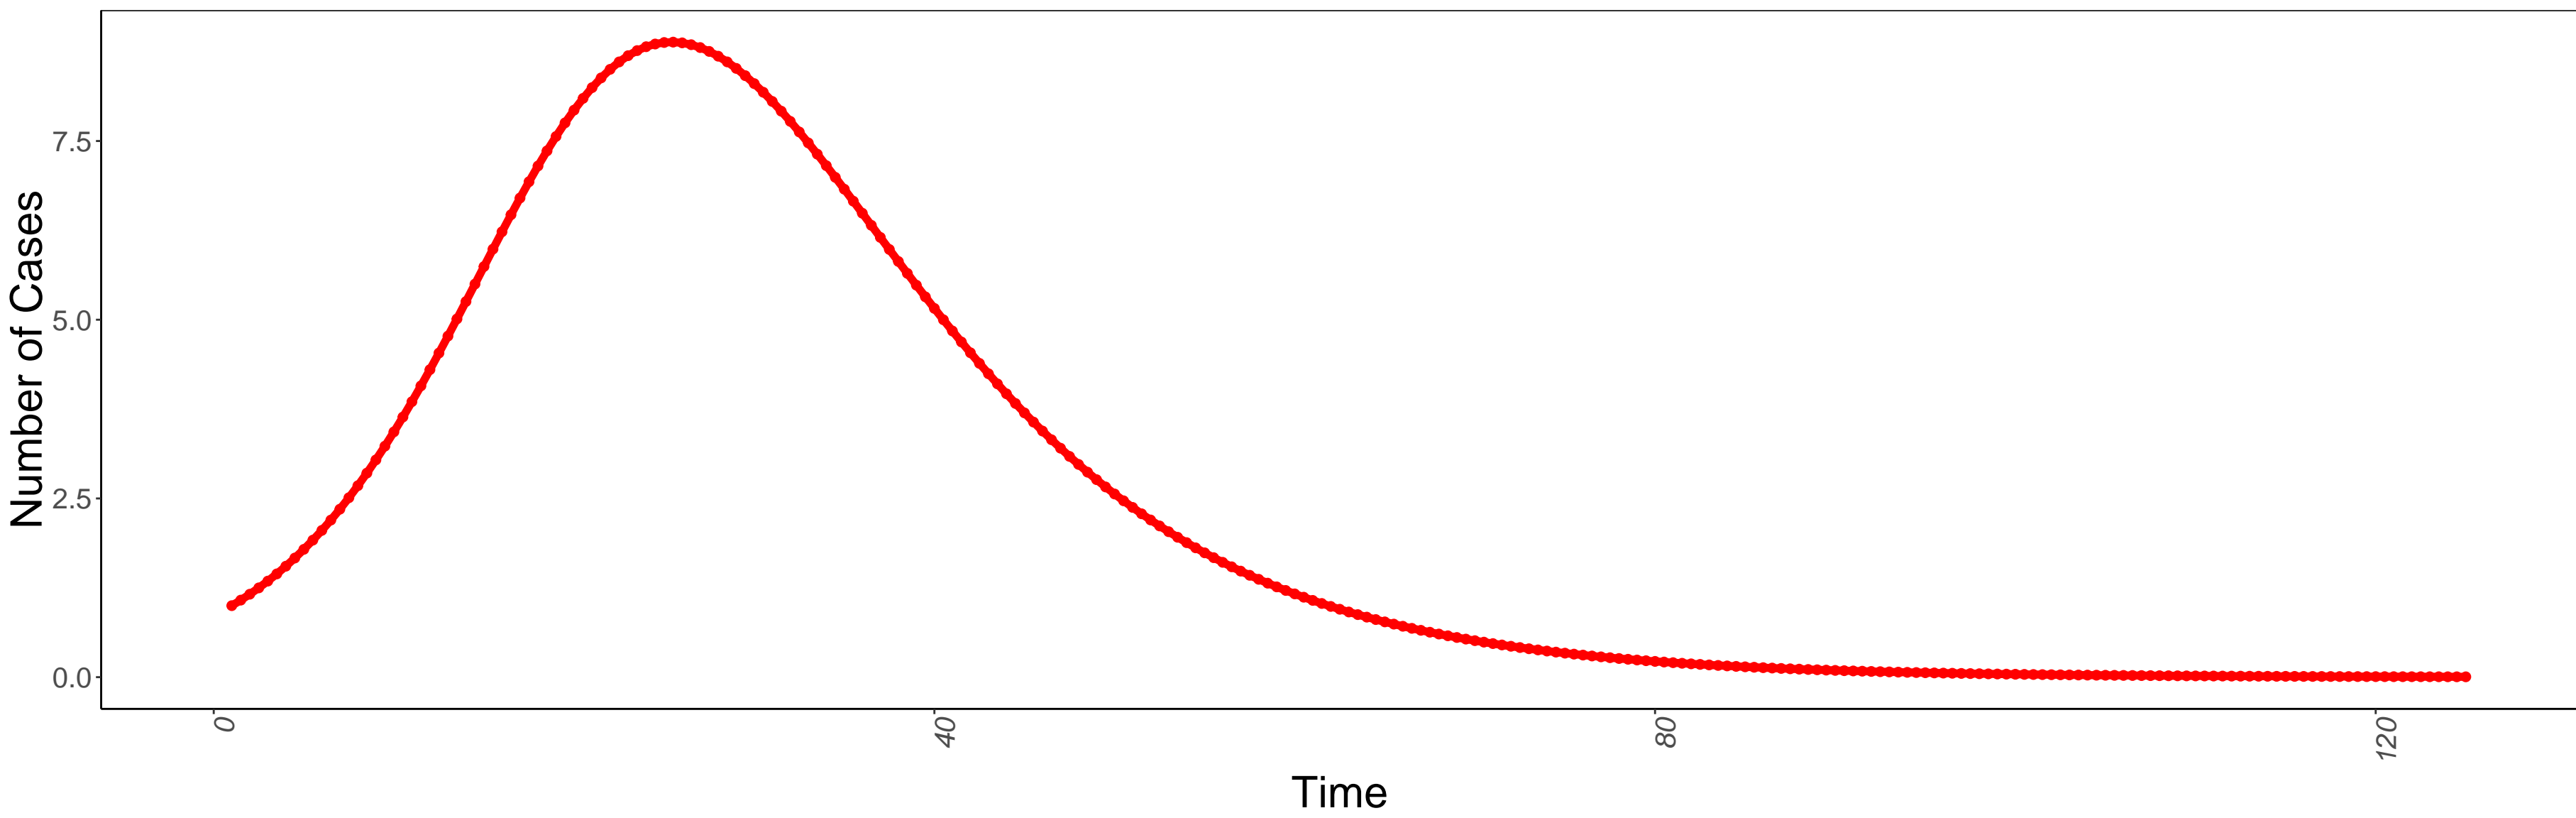

Time

V

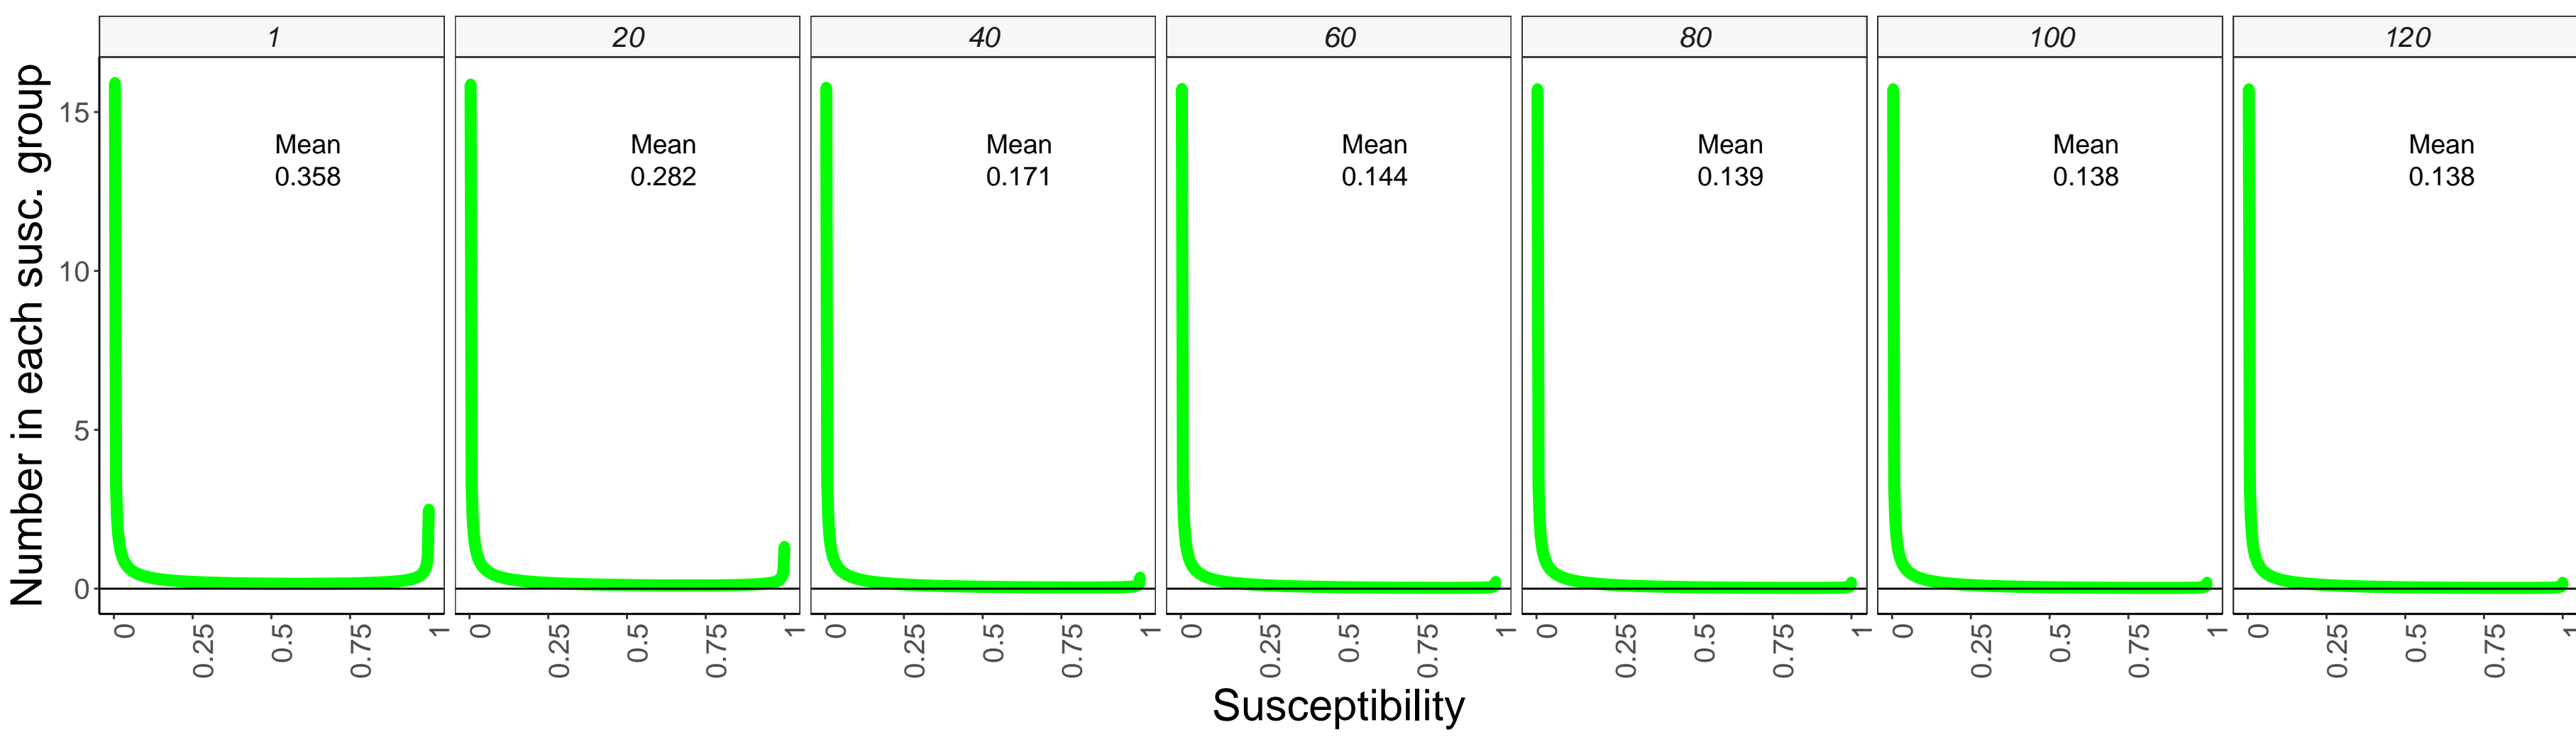

Supplement: mbo006173590sf1.pdf [file mbo006173590sf1.pdf]
