# Supplementary material for: Vaccine Effects on Heterogeneity in Susceptibility and Implications for Population Health Management
Source: PubMed Central journal article supplement (PMC5698548; doi:10.1128/mbio.00796-17), 2017-11-21

— *all-or-nothing* — *heterogeneous* — *homogeneous*

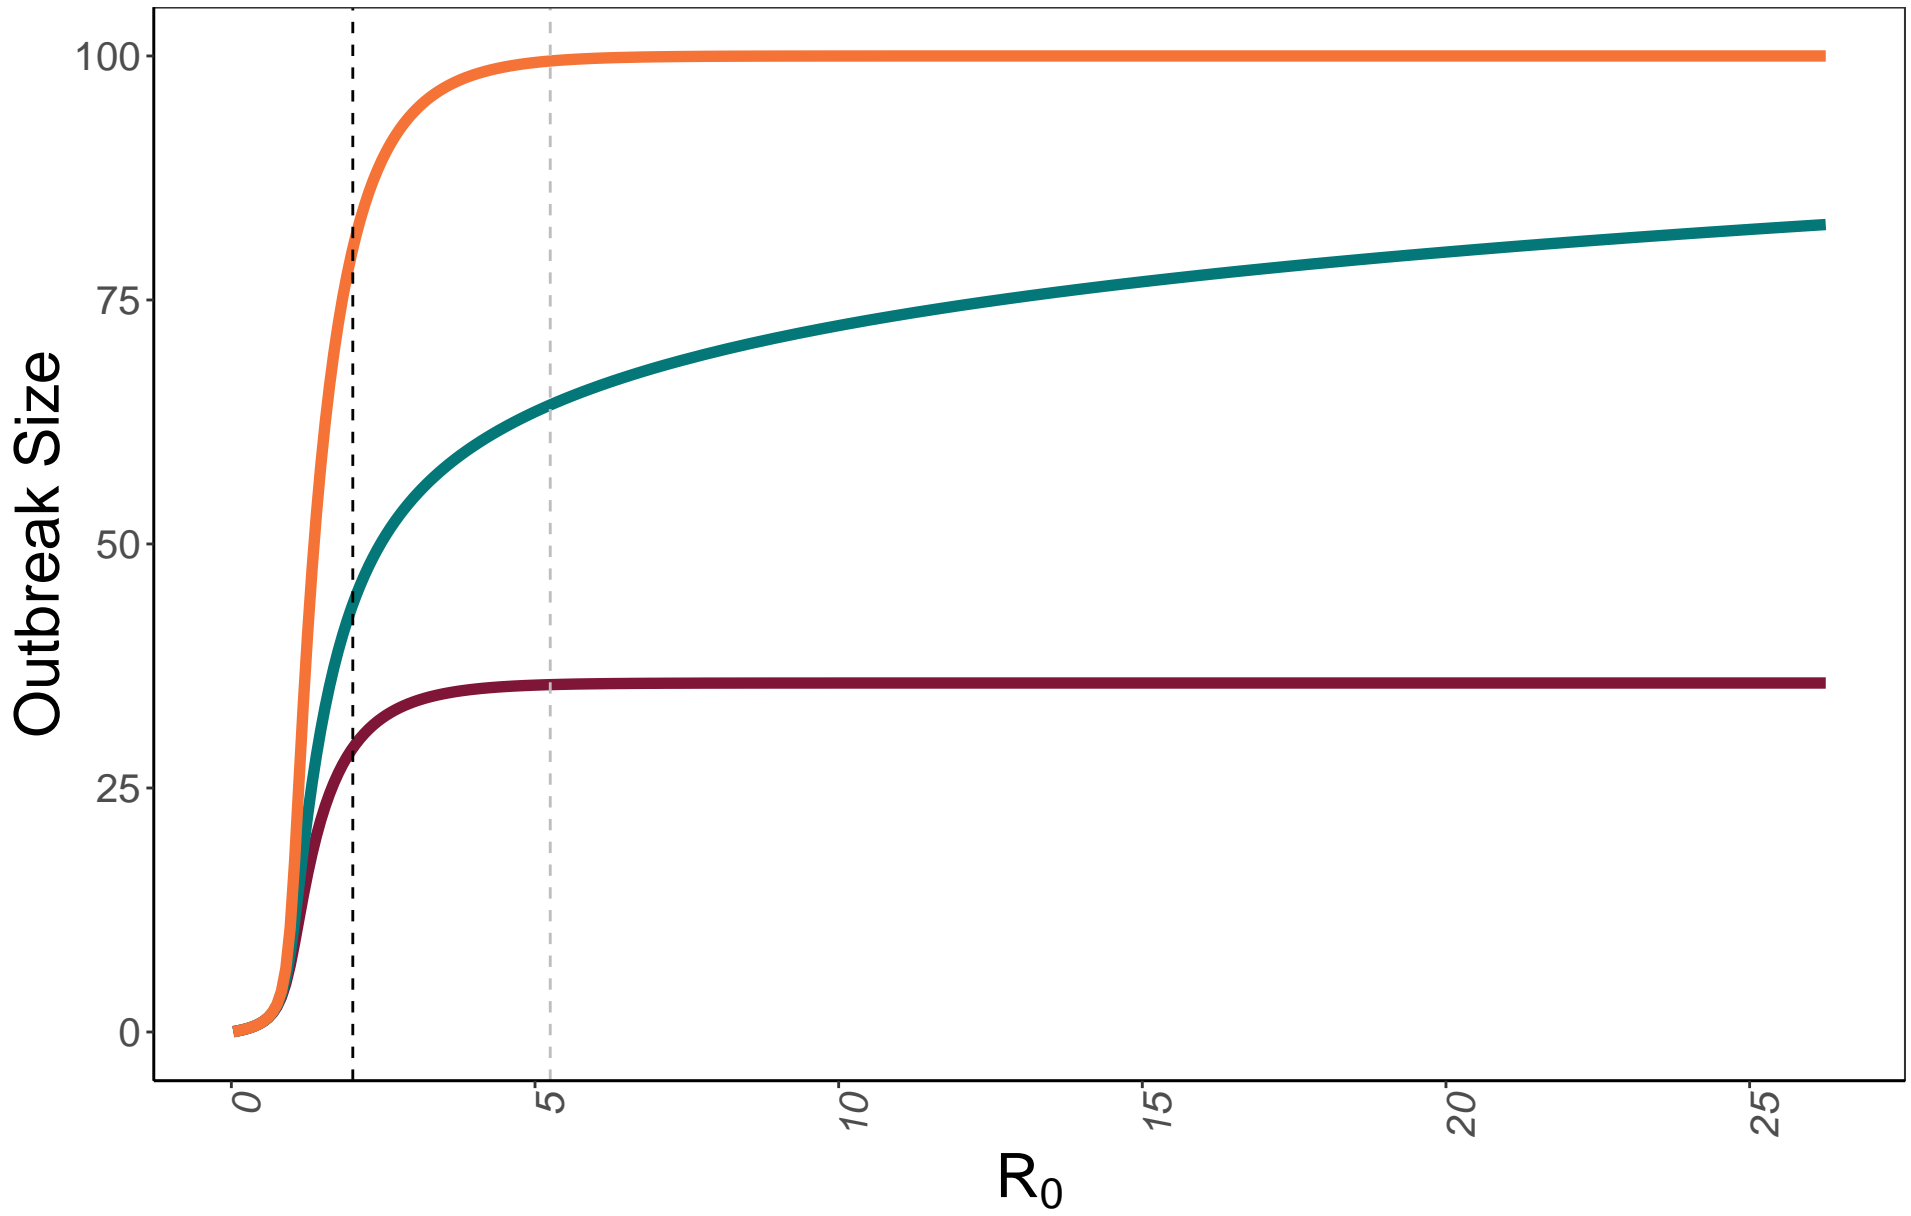

Supplement: mbo006173590sf2.pdf [file mbo006173590sf2.pdf]
